# Supplementary material
Source: PubMed Central journal article supplement (PMC2648084)
Supplement: tpc.108.059329_1.pdf [file tpc.108.059329_1.pdf]

Supplemental Data. Espley et al., (2009). Multiple repeats of a promoter segment causes transcription factor autoregulation in red apples

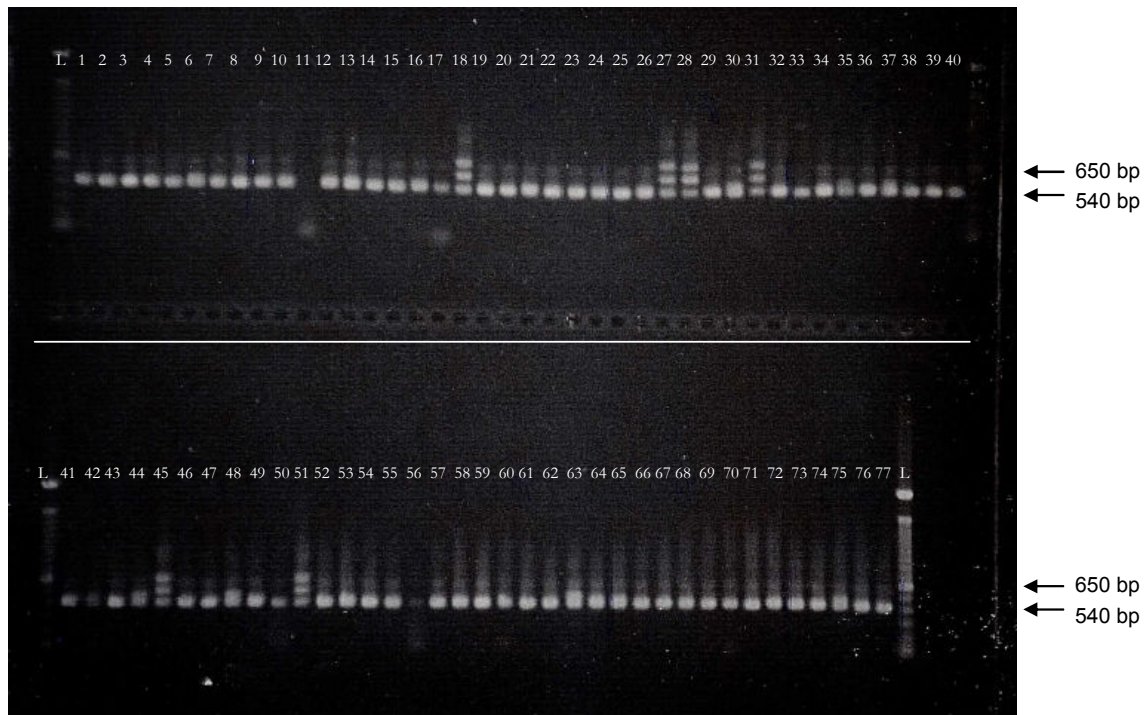

**Supplemental Figure 1. Gel picture showing products from the apple germplasm PCR assay.**

Apple genomic DNA from 77 individuals was amplified using a pair of PCR primers located in the *MYB10* promoter (forward: 5'-GGAGGGGAATGAAGAAGAGG-3'; reverse: 5'-GCTATTCTTTTGCCTGCTACC-3'). The varieties are listed in supplemental Table 1. Amplicons from the PCR reaction were found at 547bp, corresponding to the  $R_1$  allele, and 647 bp, corresponding to the the  $R_6$  allele. The higher band present in the  $R_1/R_6$  lanes represents a heteroduplex

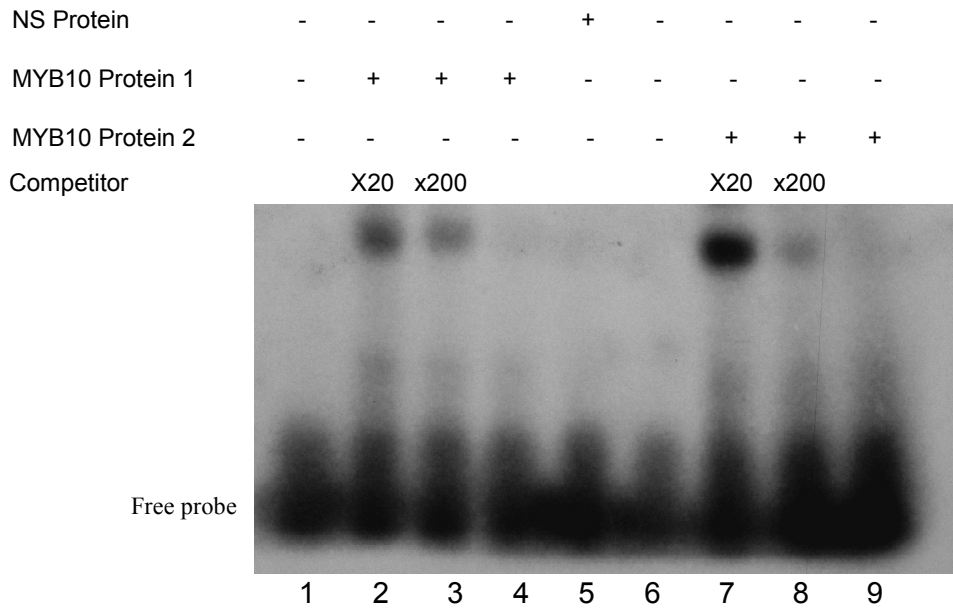

**Supplemental Figure 2. Electrophoretic mobility shift assays comparing full length and truncated MYB10 protein and a non-specific His-tagged control protein.**

No difference was observed in the binding and competition assays for the two versions. A non-specific (NS) His-tagged protein ( $\alpha$ -farnesene synthase from apple, Green et al., 2007) was also included in the experiment and did not bind with MYB10 protein. Lane 1, r1 DNA probe only; lane 2, r1 DNA probe with MYB10 full length protein; lanes 3 and 4, r1 DNA probe with MYB10 full length protein and 20-fold and 200-fold excess cold r1 competitor; lane 5, r1 DNA probe with non-specific His-tagged protein; Lane 6, r1 DNA probe only; lane 7, r1 DNA probe with MYB10 truncated protein; lanes 8 and 9, r1 DNA probe with MYB10 truncated protein and 20-fold and 200-fold excess cold r1 competitor

**Supplemental Table 1. Data for the 77 apple varieties tested for the presence of the R<sub>1</sub> and R<sub>6</sub> alleles.**

The genotype and phenotype of the 77 individuals tested for the presence of the minisatellite-like insertion. The individuals tested were Open Pollinated (OP) and the cultivar name refers to the maternal parent. The repeat motif genotype refers to R<sub>1</sub> (no minisatellite-like insertion) and R<sub>6</sub> which contains the insertion. Results from the PCR reaction are shown in Supplemental Figure 1.

| Lane | Mother cultivar name                  | Repeated motif genotype         | Foliage colour | Fruit core colour |
|------|---------------------------------------|---------------------------------|----------------|-------------------|
| 1    | Suiselpas Rozabols                    | R <sub>1</sub> : R <sub>1</sub> | Green          | White             |
| 2    | Antonovka kamenichka                  | R <sub>1</sub> : R <sub>1</sub> | Green          | White             |
| 3    | King of the Pippins                   | R <sub>1</sub> : R <sub>1</sub> | Green          | White             |
| 4    | Grenadier                             | R <sub>1</sub> : R <sub>1</sub> | Green          | White             |
| 5    | Red Baron                             | R <sub>1</sub> : R <sub>1</sub> | Green          | White             |
| 6    | Korichnoe Polosatoje                  | R <sub>1</sub> : R <sub>1</sub> | Green          | White             |
| 7    | Golden Sweet                          | R <sub>1</sub> : R <sub>1</sub> | Green          | White             |
| 8    | Krievu Rosmarins                      | R <sub>1</sub> : R <sub>1</sub> | Green          | White             |
| 9    | Bessemianka Muchirin                  | R <sub>1</sub> : R <sub>1</sub> | Green          | White             |
| 10   | Korichnoe Polosatoje                  | R <sub>1</sub> : R <sub>1</sub> | Green          | White             |
| 11   | Campanino                             | na                              | Green          | White             |
| 12   | <i>M. sieversii</i> 45-0 <sub>1</sub> | R <sub>1</sub> : R <sub>1</sub> | Green          | White             |
| 13   | <i>M. sieversii</i> 42-03             | R <sub>1</sub> : R <sub>1</sub> | Green          | White             |
| 14   | Appio                                 | R <sub>1</sub> : R <sub>1</sub> | Green          | White             |
| 15   | Grenoble                              | R <sub>1</sub> : R <sub>1</sub> | Green          | White             |
| 16   | <i>M. sieversii</i> 09-0 <sub>1</sub> | R <sub>1</sub> : R <sub>1</sub> | Green          | White             |
| 17   | Paides Ziemas-Abols                   | R <sub>1</sub> : R <sub>1</sub> | Green          | White             |
| 18   | Pomme Grise                           | R <sub>1</sub> : R <sub>6</sub> | Red            | Red               |
| 19   | Octovo                                | R <sub>1</sub> : R <sub>1</sub> | Green          | White             |
| 20   | A. Brioallay/Aromatde Vera            | R <sub>1</sub> : R <sub>1</sub> | Green          | White             |
| 21   | Styrmka                               | R <sub>1</sub> : R <sub>1</sub> | Green          | White             |
| 22   | Patte de Loup                         | R <sub>1</sub> : R <sub>1</sub> | Green          | White             |
| 23   | Jeptiska                              | R <sub>1</sub> : R <sub>1</sub> | Green          | White             |
| 24   | De Jaune                              | R <sub>1</sub> : R <sub>1</sub> | Green          | White             |
| 25   | Pomme a Cotes                         | R <sub>1</sub> : R <sub>1</sub> | Green          | White             |
| 26   | Geelzoet                              | R <sub>1</sub> : R <sub>1</sub> | Green          | White             |
| 27   | Grimes Golden                         | R <sub>1</sub> : R <sub>6</sub> | Red            | Red               |
| 28   | Zelenovka Sotchnaya                   | R <sub>1</sub> : R <sub>6</sub> | Red            | Red               |
| 29   | Wijnappel                             | R <sub>1</sub> : R <sub>1</sub> | Green          | White             |
| 30   | Pepinka Litovka                       | R <sub>1</sub> : R <sub>1</sub> | Green          | White             |
| 31   | Redfield                              | R <sub>1</sub> : R <sub>6</sub> | Red            | Red               |
| 32   | Mother                                | R <sub>1</sub> : R <sub>1</sub> | Green          | White             |
| 33   | Gloire de Ponchartrain                | R <sub>1</sub> : R <sub>1</sub> | Green          | White             |
| 34   | Zure Kroon                            | R <sub>1</sub> : R <sub>1</sub> | Green          | White             |

**Supplemental Table 1 (cont.).**

|    |                           |                                 |       |       |
|----|---------------------------|---------------------------------|-------|-------|
| 35 | Mildew immune seedling    | R <sub>1</sub> : R <sub>1</sub> | Green | White |
| 36 | Pepino Jaune              | R <sub>1</sub> : R <sub>1</sub> | Green | White |
| 37 | Chadimova                 | R <sub>1</sub> : R <sub>1</sub> | Green | White |
| 38 | Early almond              | R <sub>1</sub> : R <sub>1</sub> | Green | White |
| 39 | <i>M. sieversii</i> 19-01 | R <sub>1</sub> : R <sub>1</sub> | Green | White |
| 40 | Hornokrajske Malinove     | R <sub>1</sub> : R <sub>1</sub> | Green | White |
| 41 | Mere de Menage            | R <sub>1</sub> : R <sub>1</sub> | Green | White |
| 42 | Shaphran Letnij           | R <sub>1</sub> : R <sub>1</sub> | Green | White |
| 43 | Isayev's Desertnyi        | R <sub>1</sub> : R <sub>1</sub> | Green | White |
| 44 | Lady Williams             | R <sub>1</sub> : R <sub>1</sub> | Green | White |
| 45 | Redfield                  | R <sub>1</sub> : R <sub>6</sub> | Red   | Red   |
| 46 | Reinette Franche          | R <sub>1</sub> : R <sub>1</sub> | Green | White |
| 47 | Belle Fleur Jaune         | R <sub>1</sub> : R <sub>1</sub> | Green | White |
| 48 | Frau Margaret Von Stosch  | R <sub>1</sub> : R <sub>1</sub> | Green | White |
| 49 | Wyken Pippin              | R <sub>1</sub> : R <sub>1</sub> | Green | White |
| 50 | Frequin Rouge             | R <sub>1</sub> : R <sub>1</sub> | Green | White |
| 51 | Court Pendu Rose          | R <sub>1</sub> : R <sub>6</sub> | Red   | Red   |
| 52 | Tare de Ghinda            | R <sub>1</sub> : R <sub>1</sub> | Green | White |
| 53 | Zelenovka Sotchnaya       | R <sub>1</sub> : R <sub>1</sub> | Green | White |
| 54 | Binet Blanc Dore          | R <sub>1</sub> : R <sub>1</sub> | Green | White |
| 55 | Cerina                    | R <sub>1</sub> : R <sub>1</sub> | Green | White |
| 56 | Unknown4.99               | R <sub>1</sub> : R <sub>1</sub> | Green | White |
| 57 | Calville d'Aout           | R <sub>1</sub> : R <sub>1</sub> | Green | White |
| 58 | Blanchard                 | R <sub>1</sub> : R <sub>1</sub> | Green | White |
| 59 | <i>M. sieversii</i> 42-05 | R <sub>1</sub> : R <sub>1</sub> | Green | White |
| 60 | Commercio                 | R <sub>1</sub> : R <sub>1</sub> | Green | White |
| 61 | Pigeonet Rouge            | R <sub>1</sub> : R <sub>1</sub> | Green | White |
| 62 | Lemon Pippin              | R <sub>1</sub> : R <sub>1</sub> | Green | White |
| 63 | London Pippin             | R <sub>1</sub> : R <sub>1</sub> | Green | White |
| 64 | Reinette Franche          | R <sub>1</sub> : R <sub>1</sub> | Green | White |
| 65 | Pepino Schafranovij       | R <sub>1</sub> : R <sub>1</sub> | Green | White |
| 66 | <i>M. sieversii</i> 3-02  | R <sub>1</sub> : R <sub>1</sub> | Green | White |
| 67 | Hvezdnata Reneta          | R <sub>1</sub> : R <sub>1</sub> | Green | White |
| 68 | Decio                     | R <sub>1</sub> : R <sub>1</sub> | Green | White |
| 69 | <i>M. sieversii</i> 12-02 | R <sub>1</sub> : R <sub>1</sub> | Green | White |
| 70 | Gooseberry pippin         | R <sub>1</sub> : R <sub>1</sub> | Green | White |
| 71 | <i>M. sieversii</i> 44-03 | R <sub>1</sub> : R <sub>1</sub> | Green | White |
| 72 | <i>M. sieversii</i> 24-02 | R <sub>1</sub> : R <sub>1</sub> | Green | White |
| 73 | M. Kirzistan (Kazak)      | R <sub>1</sub> : R <sub>1</sub> | Green | White |
| 74 | Winter Queening           | R <sub>1</sub> : R <sub>1</sub> | Green | White |
| 75 | Gul Richard               | R <sub>1</sub> : R <sub>1</sub> | Green | White |
| 76 | Panenske Ceske            | R <sub>1</sub> : R <sub>1</sub> | Green | White |
| 77 | Smiricke                  | R <sub>1</sub> : R <sub>1</sub> | Green | White |

## Supplemental methods

### Plasmid Construction

The promoter deletion constructs for R<sub>1</sub> and R<sub>6</sub> were cloned into the vector *pGreen 0800-LUC* (Hellens et al., 2005), containing the luciferase reporter. An inverse PCR approach was used for the R<sub>1</sub>+ construct with the inclusion of unique restriction sites (*Bam*HI and *Sac*I) for the cloning of non-specific DNA (from pGEM T Easy, Promega) using the primers 5' – GGATCCTTCTGCACGACAACATTGACAA – 3' and 5' – GAGCTCATGTTAGCTTTTCTATATATCGA – 3'.

Promoter deletions were performed on R<sub>1</sub> and R<sub>6</sub> sequences using the following restriction enzymes; ΔA, *Hind*III (retaining the 5' fragment only), ΔB, *Spe*I, ΔC, *Ssp*I and ΔD, *Hind*III (retaining the 3' fragment only).

Deletion of the first repeat unit and microsatellite (*R<sub>0</sub>:LUC*) was based on the R<sub>1</sub>:LUC promoter construct and performed using a partial restriction digest with *Dra*I. The linear fragment was further digested with *Bsg*I and treated with T4 DNA polymerase (Promega) prior to re-ligation. For the construction of R<sub>1-R</sub> and R<sub>1-MS</sub>, R<sub>0</sub> was digested with *Bsg*I and annealed oligos were directionally cloned in with an AA (underlined below) overhang: R<sub>1-R</sub>, 5'- CTATATATCGAGTGTGTGTGTGTGTGTATTTCACAACACTGTTGGAATGTT TGAA – 3'; R<sub>1-MS</sub>, 5'- CTATATATCGAATTTTCACAACACTGTTGGAATGTTTGAA - 3'. The R<sub>6</sub> versions were based on R<sub>1-R</sub> and R<sub>1-MS</sub>. The minisatellite repeat unit from R<sub>6</sub> was amplified by PCR using the primers 5'- ATGTTGTCGTCAGAAATGTTAG -3' and 5'- GTAGCTATTAACAAGTTAGACTGTGT -3' and cloned in at the *Bsg*I restriction site to create R<sub>5</sub> and R<sub>6-MS</sub>. All clones were positively identified by bi-directional sequencing.

## **Transactivation Analysis using Transformed Tobacco Leaves**

*Nicotiana benthamiana* plants were grown until at least six leaves were available for infiltration with *Agrobacterium*. A 10 µl loop of confluent bacteria was re-suspended in 10 ml of infiltration media (10 mM MgCl<sub>2</sub>, 0.5 µM acetosyringone), to an OD<sup>600</sup> of 0.2, and incubated at room temperature without shaking for 2 h before infiltration. Approximately 150 µl of this *Agrobacterium* mixture were infiltrated at six points into a young tobacco leaf. Transient expression was analyzed three days after inoculation. Six technical replicates of 3 mm diameter leaf discs were excised from each plant using a leaf hole-punch and buffered in Phosphate Buffer Saline (PBS). Plate-based assays were conducted using a Berthold Orion Microplate Luminometer (Berthold Detection Systems) according to the manufacturer's specifications for the dual luciferase assay, using the Dual Glow assay reagents (Promega) for firefly luciferase and *Renilla* luciferase. Luminescence was calculated using Simplicity version 4.02 software (Berthold Detection Systems).

## **Production and Purification of MYB10 Protein**

Constructs for the preparation of recombinant histidine-tagged MYB10 protein extracts were built using pET30 expression vectors (Invitrogen). A full length version of *MYB10* cDNA (amino acids 1-243) was cloned into pET-30a using the *SacI/KpnI* restriction sites. Protein yield following expression in *E. coli* BL21-CodonPlus<sup>TM</sup>-RIL (Stratagene) was found to be low. Previous studies using purified plant MYB transcription factor proteins have encountered problems with toxicity of the expressed protein in host cells. These problems have been successfully resolved in by using truncated versions of the protein using a carboxy-terminal deletion (Yang et al., 2001; Gális et al., 2006). A carboxy-terminal deletion of the *MYB10* cDNA was made (retaining amino acids 1-167) and cloned into pET-30 using *BglII/NdeI* restriction sites. The truncated version contained the R2R3 DNA-binding domain. Expression levels in *E. coli* of the truncated version were found to be approximately 10-fold higher than for the full length protein. Both versions were used in EMSA analysis and showed similar results for binding and competition assays (Supplemental Figure 2). The truncated version was used for all subsequent binding studies using

EMSA. An unrelated HIS-tagged protein,  $\alpha$ -farnesene synthase from apple (Green et al., 2007) was used in EMSAs to test for non-specific binding (Supplemental Figure 1).

### Notes on Apple Genealogy

Some of the apple varieties used in this study have a common ancestor, while others are the product of open pollination (OP) and as such have an undefined parent. Below is a summary of the genealogy of apple varieties as described in Figure 2.

Common ancestry through 'Delicious' with three varieties analysed:

1. 'Mildew Immune Seedling' = OP of 'Delicious' ('Delicious' is a seedling of unknown origin) (Dayton, 1977).
8. 'Royal Gala' = 'Gala' ('Golden Delicious' x 'Kidd's Orange Red') x ('Delicious' x 'Cox's Orange Pippin') (Brooks and Olmo, 1972).
9. 'Fuji' = 'Ralls Janet' x 'Delicious' (Brooks and Olmo, 1972).

Common ancestry through *M. pumila* var. *Niedzwetzkyana* with three varieties analysed:

3. *M. pumila* var. *Niedzwetzkyana* = seedling of unknown origin (Fialo, 1994).
4. 'Prairifire' = 'Liset' x OC 6-1 (*M. astrosanguinea* x (OC 1-7 (*M. zumi calocarpa* x *M. pumila* var. *Niedzwetzkyana*))) (Dayton, 1982).
5. 'Geneva' = O.P. of *M. pumila* var. *Niedzwetzkyana* (Brooks and Olmo, 1972).

Any further pedigree relationships among remaining genotypes examined are unknown:

2. *M. purpurea* 'Aldenhamensis' = seedling of unknown origin (Fialo, 1994).
6. 'Pomme Grise' = seedling of unknown origin (Smith, 1971).
7. 'Granny Smith' = thought to be OP of 'French Crab' (Smith, 1971).
10. 'Braeburn' = seedling of unknown origin (Brooks and Olmo, 1972).

## Supplemental references

- Brooks, R.M., and Olmo, H.P.** (1972). Register of new fruit and nut varieties. (London: University of California Press).
- Dayton, D.F.** (1977). HortScience. Genetic immunity to apple mildew incited by *Podosphaera leucotricha*. HortScience **12**, 225-226.
- Dayton, D.F.** (1982). 'Prairifire'. HortScience **17**, 262.
- Fiala, J.L.** (1994). Flowering Crabapples. The Genus *Malus*. Timber Press, Portland, Oregon. pp 273.
- Gális, I., Simek, P., Narisawa, T., Sasaki, M., Horiguchi, T., Fukuda, H., and Matsuoka, K.** (2006). A novel R2R3 MYB transcription factor NtMYBJS1 is a methyl jasmonate-dependent regulator of phenylpropanoid-conjugate biosynthesis in tobacco. Plant J **46**, 573-592.
- Green, S., Friel, E.N., Matich, A., Beuning, L.L., Cooney, J.M., Rowan, D.D., and MacRae, E.** (2007). Unusual features of a recombinant apple [ $\alpha$ ]-farnesene synthase. Phytochemistry **68**, 176-188.
- Hellens, R., Allan, A., Friel, E., Bolitho, K., Grafton, K., Templeton, M., Karunairetnam, S., and Laing, W.** (2005). Transient expression vectors for functional genomics, quantification of promoter activity and RNA silencing in plants. Plant Methods **1**, 13.
- Smith, M.W.G.** (1971). National Apple Register of the United Kingdom. Ministry of Agriculture, Fisheries and Food, London. pp 652.
- Yang, S., Sweetman, J.P., Amirsadeghi, S., Barghchi, M., Huttly, A.K., Chung, W.-I., and Twell, D.** (2001). Novel Anther-Specific myb Genes from Tobacco as Putative Regulators of Phenylalanine Ammonia-Lyase Expression. Plant Physiol. **126**, 1738-1753.
